# Supplementary material
Source: HighWire-hosted journal article supplement (https://www.annfammed.org/highwire/filestream/8401/field_highwire_adjunct_files/2/559Supp_App_3.pdf)
Supplement: 559Supp_App_3.pdf [file 559Supp_App_3.pdf]

**Online Supplementary Material**

Pluye P, Grad RM, Johnson-Lafleur J, et al. The Number Needed to Benefit from Information (NNBI): proposal from a mixed methods research study with practicing family physicians. *Ann Fam Med.* 2013;11(6):559-567.

<http://www.annfammed.org/content/11/6/559>

**Supplemental Appendix 3. Fifty-three Clinical Vignettes on Patient Health Benefits Associated With Physicians' Use of Information From an Electronic Knowledge Resource**

| MD ID<br>Search ID | Bottom Line of Each Clinical Vignette                                                                                                                                                                                                                                                                 | Types of Benefit <sup>a</sup> |   |   |   |   |
|--------------------|-------------------------------------------------------------------------------------------------------------------------------------------------------------------------------------------------------------------------------------------------------------------------------------------------------|-------------------------------|---|---|---|---|
|                    |                                                                                                                                                                                                                                                                                                       | 1                             | 2 | 3 | 4 | 5 |
| MD08S03            | Information on celiac disease was used to justify the management of the patient (no testing) and contributed to avoid an unnecessary diagnostic procedure.                                                                                                                                            | X                             |   |   |   |   |
| MD08S05            | Information on Peyronie's disease was used to justify the management of the patient (no treatment, no referral) and it contributed to avoid an unnecessary intervention.                                                                                                                              | X                             |   |   |   |   |
| MD08S06            | Information on the fracture of the distal radius was used to justify the management of the patient (diagnostic procedure) and contributed to avoid an inappropriate procedure.                                                                                                                        | X                             |   |   |   |   |
| MD08S09            | Information on breast cancer was used to justify the management of the patient (no treatment) and contributed to avoid an unnecessary treatment.                                                                                                                                                      | X                             |   |   |   |   |
| MD10S10            | Information on uterine fibroids was used to maintain the management of the patient and to persuade another health professional (no ultrasound). It contributed to increase patient knowledge.                                                                                                         |                               |   | X |   |   |
| MD16S02            | Information on knee pain was used to modify the management of the patient (prescription of physical exercises) and contributed to improve patient health.                                                                                                                                             |                               |   |   | X |   |
| MD16S04            | Information on smoking cessation was used to modify the management of the patient (drug prescription) and contributed to prevent disease and improve patient health.                                                                                                                                  |                               | X |   | X |   |
| MD16S06            | Information on chronic neck pain was used to modify the management of the patient, and to persuade the patient to make changes (specific exercise program). It contributed to increase patient knowledge, avoid unnecessary treatment, prevent health deterioration, and improve patient functioning. | X                             | X | X | X |   |
| MD16S09            | Information on smoking cessation was used to persuade the patient to make changes (thinking about quitting). It contributed to an increase patient knowledge.                                                                                                                                         |                               |   | X |   |   |
| MD20S02            | Information on urinary tract infection was used to justify the management of the patient (dosage adjustment) and contributed to avoid inappropriate treatment.                                                                                                                                        | X                             |   |   |   |   |
| MD20S06            | Information on atrial fibrillation was used to maintain the management of the patient (no drug prescription) and contributed to avoid an unnecessary treatment (anticoagulation).                                                                                                                     | X                             |   |   |   |   |
| MD23S05            | Information on hip dysplasia was used to persuade the patient to make changes (do not abandon the splint) and contributed to increase patient knowledge.                                                                                                                                              |                               |   | X |   |   |
| MD23S07            | Information on vaginal birth after caesarean (VBAC) was used to persuade other health professionals to make changes (accept VBAC) and contributed to avoid an unnecessary intervention, prevent health deterioration, and improve functioning.                                                        | X                             | X |   | X |   |
| MD23S08            | Information on prostate-specific antigen was used to persuade the patient to make a change (no screening test) and contributed to avoid an unnecessary procedure.                                                                                                                                     | X                             |   |   |   |   |
| MD25S03            | Information on venous leg ulcers was used to justify the management of a patient (new medication) and contributed to improve patient health.                                                                                                                                                          |                               |   |   | X |   |
| MD27S03            | Information on neonatal jaundice was used to modify the management of the patient (from 'blood test only' to 'hospital admission') and contributed to prevent health deterioration.                                                                                                                   |                               | X |   |   |   |
| MD27S04            | Information on croup was used to justify the management of the patient (no hospital admission) and contributed to avoid an unnecessary intervention.                                                                                                                                                  | X                             |   |   |   |   |

Online Supplementary Data

<http://www.annfammed.org/content/11/6/559/DC1>

|         |                                                                                                                                                                                                                                                                                                                          |   |   |   |   |   |
|---------|--------------------------------------------------------------------------------------------------------------------------------------------------------------------------------------------------------------------------------------------------------------------------------------------------------------------------|---|---|---|---|---|
| MD27S09 | Information on acute conjunctivitis was used to justify the management of the patient (treatment with antibiotics) and contributed to avoid an unnecessary treatment.                                                                                                                                                    | X |   |   |   |   |
| MD27S10 | Information on hyponatremia was used to justify the management of the patient (appropriate rehydration and fluids replacement). It contributed to avoid an inappropriate intervention, prevent health deterioration, and improve health.                                                                                 | X | X |   | X |   |
| MD30S03 | Information on thoracic outlet syndrome was used to modify the management of the patient, and to persuade the patient to make changes (medication). It contributed to prevent health deterioration, and improve patient health.                                                                                          |   | X |   | X |   |
| MD30S04 | Information on gynecomastia was used to modify the management of the patient (diagnostic tests ordering). It contributed to avoid unnecessary referral.                                                                                                                                                                  | X |   |   |   |   |
| MD31S04 | Information on uterine fibroids was used to justify the management of the patient (no intervention). It contributed to increase patient knowledge, and avoid unnecessary intervention (C-section).                                                                                                                       | X |   | X |   |   |
| MD31S05 | Information on menorrhagia was used to modify the management of a patient (medication) and contributed to avoid an unnecessary referral.                                                                                                                                                                                 | X |   |   |   |   |
| MD31S07 | Information on Down's syndrome was used to justify the management of the patient (medication for behavioural problem). It contributed to increase caregiver's acceptability of (satisfaction with) treatment, improve patient functioning (stabilisation), and avoid unnecessary intervention (no institutionalisation). | X |   |   | X | X |
| MD31S10 | Information on obesity was used to modify the management of the patient (diet counselling). It contributed to increase patient knowledge.                                                                                                                                                                                |   |   | X |   |   |
| MD32S09 | Information on urinary retention was used to persuade other health professionals to make a change (intermittent catheterisation). It contributed to avoid an inappropriate intervention (indwelling catheter) and prevent health deterioration.                                                                          | X | X |   |   |   |
| MD34S04 | Information on celiac disease was used to justify the management of a patient (screening for other diseases) and contributed to avoid an inappropriate diagnostic procedure.                                                                                                                                             | X |   |   |   |   |
| MD34S08 | Information on prevention of bacterial endocarditis was used to modify the management of a patient (from prescription of antibiotics to no antibiotics) and contributed to increase patient acceptability (satisfaction).                                                                                                |   |   |   |   | X |
| MD35S08 | Information on herpes simplex was used to persuade the patient to make change (oral medication). It contributed to increase patient knowledge, avoid less appropriate intervention (cream), and prevent disease (acute episodes).                                                                                        | X | X | X |   |   |
| MD37S02 | Information on lupus erythematosus was used to justify the management of a patient (new cream), and contributed to increase patient acceptability of (satisfaction with) the treatment.                                                                                                                                  |   |   |   |   | X |
| MD38S04 | Information on hepatitis C was used to justify the management of the patient (follow-up) and contributed to prevent health deterioration.                                                                                                                                                                                |   | X |   |   |   |
| MD39S01 | Information on gout was used to modify the management of a patient and to persuade a patient and a resident to make changes (preventive measures). It would contribute to prevent health deterioration (acute gout).                                                                                                     |   | X |   |   |   |
| MD42S01 | Information on Wilson's disease was used to modify the management of a patient (diagnostic procedure). It contributed to increase patient knowledge and improve patient health and functioning.                                                                                                                          |   |   | X | X |   |
| MD42S02 | Information on dementia was used to persuade a patient to make a change (stop using ginkgo). It contributed to increase patient knowledge and avoid an unnecessary preventive intervention.                                                                                                                              | X |   | X |   |   |
| MD42S03 | Information on food allergy was used to persuade a patient to make a change (no testing). It contributed to increase patient knowledge and avoid an unnecessary diagnostic procedure.                                                                                                                                    | X |   | X |   |   |
| MD42S05 | Information on kidney malignant neoplasm was used to persuade the patient to make a change (increased frequency of testing). It contributed to avoid inappropriate diagnostic procedure and prevent health deterioration.                                                                                                | X | X |   |   |   |
| MD42S08 | Information on paronychia and onychia was used to persuade a patient to make a change (surgery). It contributed to avoid inappropriate treatment, prevent health deterioration, and improve health.                                                                                                                      | X | X |   | X |   |
| MD42S10 | Information on hepatitis B vaccine was used to justify the management of a patient (administer a vaccine booster dose). It contributed to increase patient knowledge and avoid unnecessary preventive intervention.                                                                                                      | X |   | X |   |   |
| MD43S01 | Information on methicillin-resistant staphylococcus aureus (MRSA) was used to justify the management of the patient (preventive measures) and contributed to prevent diseases.                                                                                                                                           |   | X |   |   |   |

**Online Supplementary Data**

<http://www.annfammed.org/content/11/6/559/DC1>

|         |                                                                                                                                                                                                                                                                                      |   |   |   |   |   |
|---------|--------------------------------------------------------------------------------------------------------------------------------------------------------------------------------------------------------------------------------------------------------------------------------------|---|---|---|---|---|
| MD43S02 | Information on giardiasis was used to justify the management of the patient (medication) and contributed to improve patient health and prevent health deterioration.                                                                                                                 |   | X |   | X |   |
| MD43S04 | Information on malaria was used to justify the management of the patient (preventive medication), and it would contribute to prevent disease.                                                                                                                                        |   | X |   |   |   |
| MD44S01 | Information on intraocular lens (cataract surgery) was used to better understand a specific issue about the management of a patient. It contributed to increase patient knowledge.                                                                                                   |   |   | X |   |   |
| MD44S05 | Information on macrocytosis was used to modify the management of the patient, and to persuade health professionals to make a change (further testing). It contributed to increase patient knowledge.                                                                                 |   |   | X |   |   |
| MD44S08 | Information on breastfeeding was used to persuade another health professional to make a change (breastfeeding counselling). It contributed to increase patient acceptability of (satisfaction with) the treatment and improve resilience.                                            |   |   |   | X | X |
| MD45S01 | Information on black cohosh was used to modify the management of a patient and to persuade the patient and a health professional to make a change (no medication). It contributed to avoid an inappropriate treatment for a patient with breast cancer, and to prevent liver damage. | X | X |   |   |   |
| MD45S04 | Information on achalasia and esophageal spasm was used to maintain the management of the patient (nitrates) and contributed to increase patient knowledge.                                                                                                                           |   |   | X |   |   |
| MD45S05 | Information on mastalgia was used to modify the management of the patient and to persuade the patient to make a change (no prescription of evening primrose oil). It contributed to increase patient knowledge and avoid unnecessary treatment.                                      | X |   | X |   |   |
| MD52S03 | Information on dementia was used to persuade a patient's caregiver to make changes (referral to geriatrics), and it contributed to increase a caregiver's knowledge about health care (planning homecare: support from the community and health care professionals).                 |   |   | X |   |   |
| MD52S05 | Information on screening for ovarian cancer was used to modify the management of a patient (test ordering). It contributed to increase patient knowledge, prevent disease, and improve patient functioning (decreased anxiety).                                                      |   | X | X | X |   |
| MD53S03 | Information on giardiasis was used to maintain the management of the patient (medication). It contributed to increase patient knowledge.                                                                                                                                             |   |   | X |   |   |
| MD56S04 | Information on the Syndrome of Inappropriate Anti-Diuretic Hormone (SIADH) was used to justify the management of a patient (fluid restriction) and contributed to prevent health deterioration (severe hyponatremia).                                                                |   | X |   |   |   |
| MD56S05 | Information on the antinuclear antibody test was used to justify the management of a patient (more specific testing and clinical follow-up), and it contributed to avoid unnecessary diagnostic procedure.                                                                           | X |   |   |   |   |
| MD56S06 | Information on systemic lupus erythematosus was used to justify the management of a patient (diagnostic criteria) and contributed to avoid unnecessary diagnostic procedures (no further testing).                                                                                   | X |   |   |   |   |

<sup>a</sup> **Types of patient health benefits perceived by family physicians**

1. Avoid unnecessary or inappropriate treatment, diagnostic procedure, or preventive intervention.
2. Prevent disease or health deterioration (including acute episode of chronic disease).
3. Increase patient knowledge about health or health care.
4. Improve patient health or functioning or resilience.
5. Increase acceptability of (satisfaction with) treatment, diagnostic procedure, or preventive intervention.
